1  
2  
3  
4  
5  
6  
7  
8  
9  
10  
11  
12  
13  
14  
15  
16  
17  
18  
19  
20  
21  
22

**Obesity: can environmental food odours make you lose control?  
Investigation of implicit priming effects on reactivity and  
inhibitory control towards foods**

Marine Mas<sup>1\*</sup>, Marie-Claude Brindisi<sup>1, 2</sup>, Claire Chabanet<sup>1</sup>, Stéphanie Chambaron<sup>1</sup>

<sup>1</sup>Centre des Sciences du Goût et de l'Alimentation, AgroSup Dijon, CNRS, INRAE,  
Université Bourgogne Franche-Comté, Dijon, France

<sup>2</sup>Department of Diabetes and Clinical Nutrition, Centre Hospitalier Universitaire de Dijon,  
Dijon, France

\* Corresponding author

E-mail: [marine.mas@inrae.fr](mailto:marine.mas@inrae.fr) (MM)

23 **Abstract (150 mots max)**

24 The food environment can interact with cognitive processing and influence eating behaviour. Our objective was  
25 to characterize the impact of implicit olfactory priming on inhibitory control towards food, in groups with  
26 different weight status. Ninety-two adults completed the Food Inhibition Task: they had to detect target stimuli  
27 and ignore distractor stimuli while primed with non-attentively perceived odours. We measured reactivity and  
28 inhibitory control towards food pictures. In all participants, food pictures were detected more quickly and  
29 induced more disinhibition than neutral pictures. Only individuals with obesity were slower to detect foods when  
30 primed with a high energy-dense food odour than in control conditions. Common mechanisms were observed for  
31 the top-down processing of foods, regardless of weight status, but we observed specific priming effects related to  
32 weight status on bottom-up processes. Our results contribute to current knowledge regarding the relationship  
33 between cognitive load and food reactivity in an obesogenic environment.

34

35 **INTRODUCTION**

36 Studies have shown that individuals with obesity tend to have poorer inhibition capacities when it comes to food  
37 (1,2). In our food-abundant environment, this tendency inevitably leads to overeating, i.e. eating more than one's  
38 physiological needs. This type of impaired inhibition can naturally lead to weight gain and even to obesity.

39 ***Environmental factors and bottom-up cognitive processing of foods.***

40 The combination of excess calorie intake and a lack of caloric expenditure results in weight excess, overweight,  
41 and often obesity. This phenomenon is related to our environment: for most people in modern day society, food  
42 is abundant and easily accessible. Moreover, daily exercise is now a choice rather than an obligation. Scientists  
43 have therefore introduced the idea of the “obesogenic” environment, inferring that the influence of the  
44 environment is a key feature of the current obesity epidemic. According to Swinburn et al., “the physiology of  
45 energy balance is proximally determined by behaviours and distally by environments” (3). However, it is still  
46 difficult to explain how, why, and under which conditions the obesogenic environment can influence food  
47 choices on an information-processing level. Indeed, obesity has a multifactorial aetiology, and researchers have  
48 highlighted genetic, metabolic, social, psychological, cognitive, and environmental factors that contribute to the  
49 maintenance and development of obesity (3–6).

50 People are, by nature, attracted to food (7). Food stimuli seem to be more salient and to bias individuals'  
51 attention in an exogenous manner (8). Such processes are referred to as “bottom-up” or stimulus-driven

52 processes, meaning that data from the environment drive our perception of stimuli. In a previous study, we  
53 highlighted the differing influence of insidious environmental olfactory food cues on the stimulus-driven  
54 cognitive processing of food pictures in individuals with different weight statuses (9). Indeed, when primed with  
55 non-attentively perceived odours signalling high energy-dense (HED) foods, participants with obesity tended to  
56 show greater orienting attentional biases (*i.e. the individual tendency to automatically orient one's attention*  
57 *toward specific stimuli*) toward food pictures than when primed with non-attentively perceived odours signalling  
58 low energy-dense (LED) foods. This tendency was reversed for individuals with normal weight status, and  
59 different from the pattern of attentional orienting toward foods in individuals with overweight. In sum, implicit  
60 olfactory priming with food odours can either increase or decrease the perceptual salience of foods in different  
61 ways according to weight status by influencing the cognitive processing of such stimuli, and, hypothetically,  
62 further food choices.

63 These results highlight that, even if the exogenous attentional processing of foods seems to be similar all along  
64 the weight status continuum (9,10), there might be some cognitive vulnerability to HED food cues among  
65 individuals with higher weight statuses. Food cues may thus create a context that facilitates consumption of HED  
66 foods, and, within this context, those with a higher weight status could be influenced on a cognitive level. In our  
67 obesogenic environment, this vulnerability might contribute to the maintenance of weight excess by influencing  
68 food choices in individuals with obesity. Since our previous study focused exclusively on bottom-up processing,  
69 we consequently wondered whether olfactory priming with food cues could also have differentiated effects on  
70 goal-directed or “top-down” processes such as inhibitory control. This contribution would help us to clarify the  
71 links between the processing of food cues and food-related decision-making.

## 72 ***Inhibitory control and its implications in the decisional process***

73 Inhibitory control is part of the executive functions, which are cognitive functions responsible for transmission  
74 between endogenous (mood, thoughts, sensations) and exogenous (environmental) events. Executive functions  
75 are involved in problem-solving and decision-making, which are necessary for the execution of goal-directed  
76 actions (11–13). Inhibitory control is a remarkable executive function that makes it possible for us to stay  
77 consistent with our behavioural intentions on attentional, cognitive and behavioural levels. There are three  
78 defined components of inhibitory control: (a) attentional control, allowing us to focus our attention on stimuli of  
79 interest and to avoid wasting mental resources on non-pertinent stimuli, (b) cognitive inhibition, namely the  
80 ability to resist proactive interference from prepotent stimuli in information processing, and (c) self-control, the  
81 ability to control one's behaviour instead of acting impulsively (14). Each of these three components is involved

82 in a specific type of stimulus processing, which helps individuals to adapt to changing situations by enabling  
83 voluntary behaviours and inhibiting possible perturbations.

84 The hypothesis of a deficit in inhibitory control among individuals with obesity has been widely explored by  
85 researchers in an effort to explain why weight loss remains difficult, and to find innovative opportunities to  
86 reduce obesity (15). Such a deficit could lead to a decrease in the ability to pursue goal-directed behaviour, such  
87 as maintaining a healthy lifestyle. In this line of study, some authors showed that individuals with obesity have  
88 lower inhibitory control, (2,12,16,17) while other studies found no differences related to weight status (18,19).  
89 No consensus has been found so far, potentially due to the diversity of methodologies (20). Additionally, other  
90 variables (such as frequent comorbidities in obesity, or specific eating styles) are susceptible to modulate  
91 inhibitory control capacities beyond weight status (19,21–23). Applied to food-choice behaviour, low inhibitory  
92 control is related to excessive consumption of HED foods, especially in contexts of consumption facilitation  
93 (24,25). Moreover, in an obesogenic context where there is an overload of information, few cognitive resources  
94 remain available to inhibit one's attention, thoughts and behaviours. This may guide individuals toward default  
95 choices, namely palatable but unhealthy foods (7).

96 Some sensory cues create a context of facilitation by guiding the individual toward consumption (26) while  
97 offering opportunities to succumb to the temptation of palatable foods. Among these cues, food odours have a  
98 strong influence; they signal the availability of foods without necessarily raising awareness (27,28). Indeed, we  
99 found that non-attentively-primed olfactory HED food cues led individuals with obesity to direct their attention  
100 more toward foods (9). These observations led us to question whether olfactory priming could facilitate a deficit  
101 of inhibitory control toward foods. Previously, we demonstrated the differentiated effects of non-attentively  
102 perceived food cues on attentional biases (implicit measure of a bottom-up process) depending on weight status;  
103 here we aimed to measure the same effects on inhibitory control toward foods. To our knowledge, our study is  
104 the first to explore the relationship between a context of facilitation and inhibitory control toward foods (high  
105 and low energy-dense foods vs. neutral non-food stimuli) in male and female adults of various weight statuses  
106 (normal-weight, overweight, obese) and with no eating disorder.

107 The first aim of this study was to characterize inhibitory control toward food pictures in individuals with normal-  
108 weight, overweight and obesity. Our second aim was to study how olfactory priming affected top-down  
109 processes in individuals with various weight statuses, by measuring their inhibitory control capacities when non-  
110 attentively exposed to olfactory food cues compared to non-exposed. Our main hypothesis was that, compared

111 with neutral stimuli (objects), individuals facing food stimuli would have decreased inhibitory control, especially  
112 when the food stimuli were HED. We expected that this deficit would be increased in individuals with higher  
113 weight status, especially when non-attentively primed with olfactory food cues.

## 114 **MATERIAL & METHODS**

### 115 *Participants.*

116 124 adults aged from 20 to 60 years old were recruited and grouped according to their body mass index (BMI,  
117 kg/m<sup>2</sup>, (29,30); 38 individuals with obesity (OB), 45 individuals with overweight (OW), and 41 individuals with  
118 normal weight (NW). The study was conducted in accordance with the Declaration of Helsinki and was  
119 approved by the Comité d'Evaluation Ethique de l'Inserm (CEEI, File number IRB 0000388817-417–Project  
120 number X 467). This research study adhered to all applicable institutional and governmental regulations  
121 concerning the ethical use of human volunteers.

122 Exclusion criteria were: age under 18 or over 60 years old, diagnosis of a chronic disease (such as type II  
123 diabetes, cardiovascular disease, or hypertension), regular medical treatment causing cognitive impairment  
124 (antipsychotic, anxiolytic, or antidepressant), olfactory impairment (anosmia, hyposmia, chronic sinusitis) and a  
125 history of bariatric surgery. Additionally, participants who were sick (cold or flu symptoms) at the time of the  
126 experiment were asked to postpone their appointment with the laboratory in order to ensure that they did not  
127 have an impaired sense of smell during the session.

128 Written informed consent was obtained from participants before their participation, though they came to the  
129 session under a false pretense (i.e., to participate to a computerized experiment on picture categorization). At the  
130 end of the experiment, participants were entirely debriefed and told the real purpose of the study. In return for  
131 their participation, the participants received a €10 voucher at the end of the session.

### 132 *Measurements*

#### 133 *An adaptation of the Affective Shifting Task: The Food Inhibition Task (F.I.T)*

134 In order to measure inhibition toward foods, we adapted the affective shifting task (31,32) modified by Mobbs,  
135 Iglesias, Golay, & Van der Linden, 2011. This task is based on the Go/No-go paradigm (for a review, see  
136 Gomez, Ratcliff, & Perea, 2007). In this task, participants must both (a) detect target stimuli (go trials) by  
137 pressing the spacebar on a computer keyboard and (b) withhold their response to distracter stimuli (no-go trials).  
138 Participants were instructed to respond as fast and as accurately as they could. During the task, two instruction

139 types alternated: target stimuli were either food stimuli (“food set”, HED or LED food pictures) or objects  
140 (“object set”, tools or household objects). Stimuli were selected from FoodPics (35) and rigorously paired in  
141 terms of perceptual and consumer properties according to the procedure used in (9).

142 The task comprised 3 blocks of 112 trials each. Each block comprised 4 sets (order: food-object-food-object) of  
143 28 trials each (28% HED trials, 28% LED trials and 44% objects trial, in a pseudo-random order without three  
144 pictures of the same type appearing consecutively). See fig 1. for details. Each set began with oral instructions  
145 about the target stimuli (food or object) given through a headset, then a fixation cross appeared for 500ms at the  
146 centre of a black screen. Subsequently, pictures appeared one by one for 500ms, with an inter-stimuli-interval of  
147 900ms consisting of a white fixation cross on a black screen that participants were instructed to fixate.  
148 Commission and omission errors were signalled to the participant by a short sound conveyed by the headset.  
149 Blocks were separated by 1-minute pauses during which experimenters took the headsets off participants and  
150 invited them to relax. Prior to measurements, participants completed a brief training session comprising 4 sets of  
151 10 trials in order to familiarize them with the task. They were asked to rate their hunger level on a 10-point  
152 Likert scale before and after the Food Inhibition Task.

153 For each subject and for each experimental trial, we collected the reaction times (RT), the presence of a  
154 commission error (detecting a distractor stimulus) and the presence of an omission error (not detecting a target  
155 stimulus). Reaction times corresponded to the time between the appearance of the stimulus on screen and the  
156 moment the participant pressed the space bar to detect it (0 to 500ms). Commission errors corresponded to  
157 situations in the no-go trials in which the participant pressed the space bar, indicating a lack of response  
158 inhibition to distractor stimuli. Omission errors corresponded to go-trials for which the participant did not press  
159 the space bar to detect the target stimulus, indicating a lack of attention to the given stimulus (32,36).

### 160 ***Priming.***

161 In order to non-attentively expose participants to olfactory food cues, we used the olfactory priming paradigm  
162 developed by Marty & al. in 2017 (9,37). In this paradigm, participants perform three identical blocks of a  
163 computerized task (here, the Food Inhibition Task) while wearing a headset with a microphone. The headsets are  
164 used to provide instructions to participants, and, unbeknownst to participants, the microphones are used as  
165 brackets for odorized microphone foams. Task blocks are separated by short pauses during which experimenters  
166 discreetly switch the headsets in order to non-attentively expose participants to different olfactory food cues  
167 through the odorized foams of the headset’s microphone. Our study had three different olfactory priming

168 conditions: odour signalling HED foods (fatty sweet pound cake odour), odour signalling LED foods (fruity pear  
169 odour) and control condition in which the foam was not odorized.

170

171 **Fig. 1.** Composition of blocks, sets and trials of the Food Inhibition Task (FIT). F = food, O = object.

172 Participants come to the laboratory under a false pretence (here, taking part in a study on picture categorization)  
173 so they do not guess the presence of olfactory cues during the session. At the end of the three blocks of the task,  
174 participants complete an investigation questionnaire in which they have to guess the aim of the experiment and  
175 indicate whether they noticed anything particular during the task that could have influenced their performance.  
176 Participants mentioning odours or headsets in this questionnaire are excluded from the study. This step ensures  
177 that no odour or headset change was perceived, which allows the implicit quality of the priming (9).

### 178 ***Global Cognitive Capacities***

179 In order to measure the global inhibition performance in our sample, participants performed standardized tests,  
180 namely the Go/No-go and flexibility subtests of the computerized Test of Attentional Performance (TAP)  
181 neuropsychological test battery (38).

182 The Go/no-Go subtest explores response inhibition through a simple task in which the participant must detect  
183 target stimuli “X” and withhold a response when presented with distractor stimuli “+”. The flexibility subtest  
184 assesses shifting abilities in mental flexibility. In this subtest, two stimuli appear, one on the left and one on the  
185 right side of the screen. One of the stimuli is round while the other is an angular shape. The participant must  
186 detect whether the round shape is on the left or on the right side of the screen by pressing the corresponding key  
187 with the dominant hand through several trials. Participants were given a brief training before each subtest. The  
188 assessment began systematically with the Go/No-go subtest.

### 189 ***Session***

190 Participants came to the laboratory at 12 p.m. They were instructed to refrain from eating, drinking anything  
191 except water, wearing scented cosmetics, smoking or chewing gum for 3 hours prior to the session. They began  
192 the session with the three blocks of the Food Inhibition Task (FIT), followed by the investigation questionnaire  
193 and a hunger rating on a 10-point Likert scale. Then, they were administered the two subtests of the TAP (38),  
194 namely Go/No-go and Flexibility, in order to check their global cognitive performance. Afterwards, participants  
195 filled a computerized version of the Questionnaire for Eating Disorder Diagnosis – Q-EDD (39,40) in order to

196 identify and exclude participants with potential eating disorders. Finally, participants passed the European Test  
197 for Olfactory Capacities – ETOC (41) in order to ensure that they could correctly detect and identify odours. At  
198 the end of the session, the weight and height of each participant were measured, individually, in a separate room  
199 by the experimenter.

## 200 **RESULTS**

### 201 *Sample characteristics*

202 At the end of the tests, 32 participants were excluded from the sample (see details in Fig. 2). Indeed, 25 declared  
203 that they had smelled an odour during the session, meaning that the priming was not implicit for those  
204 participants. Five participants were screened as disordered eaters according to the Q-EDD, and two more  
205 participants were excluded because their answers to the ETOC indicated that they had low olfactory capacities  
206 (hyposmia or anosmia).

207

208 **Fig. 2:** Flowchart of exclusions. NW = participants with normal weight, OW = participants with overweight, OB  
209 = participants with obesity.

210 Finally, 92 participants remained eligible for analysis: 31 participants with normal-weight, 33 participants with  
211 overweight and 28 participants with obesity (according to their BMI measurements).

212 When comparing the sociodemographic data of the 3 BMI groups, ANOVA test were used for quantitative  
213 variables and Chi2 tests were used for categorical variables (sex ratio, educational level). No significant  
214 differences were observed in age, sex ratio, educational level, hunger level before the session or variations in  
215 hunger during the session. To measure the change in hunger, the hunger level before the session was subtracted  
216 from hunger level after session (both had been rated on a 10-point Likert scale before and after the FIT).

217 For the scores on the TAP sub-tests, performances are indicated in T-scores for the number of errors (reflective  
218 of inhibitory control capacities) in the Go/No-go subtest. For the flexibility subtest, a global performance index  
219 (GPI, (38)) was calculated for each participant, based on the T-scores for reaction times and the T-scores  
220 concerning the number of errors for each participant ( $0.707 * (T_{\text{Median RT}} + T_{\text{Number of errors}} - 100)$ ). If the GPI is  
221 positive (>0), individual performance is interpreted as being above the mean performance of the reference  
222 sample (normative data), while if it is negative (< 0), it is interpreted as being lower than the average  
223 performance of the reference sample (normative data). T-scores are normalized scores based on the percentile of



224 scores in a reference population (mean=50, SD=10, (38). Average performance is comprised between 43 and 57  
 225 (corresponding to the 25 and 75 percentile, respectively) and T-scores are adjusted on sex, gender and  
 226 educational level. No significant difference in global inhibition (Go/No-go) and flexibility were found between

|                                                   | <b>Weight status</b>             |         |                                  |        |                              |         |
|---------------------------------------------------|----------------------------------|---------|----------------------------------|--------|------------------------------|---------|
|                                                   | Normal-weight (NW)<br>n=31 (34%) |         | Overweight<br>(OW)<br>n=33 (36%) |        | Obesity<br>(O)<br>n=28 (30%) |         |
|                                                   | Mean                             | (SD)    | Mean                             | (SD)   | Mean                         | (SD)    |
| <b>Age (y): p=0.73</b>                            | 43.41                            | (11.07) | 43.96                            | (8.69) | 41.89                        | (11.30) |
| <b>BMI (kg/m<sup>2</sup>): p&lt;0.001</b>         | 21.95 <sup>a</sup>               | (1.77)  | 27.35 <sup>b</sup>               | (1.40) | 36.43 <sup>c</sup>           | (5.75)  |
| <b>Hunger level before session (1-10): p=0.18</b> | 6.33                             | (2.14)  | 5.45                             | (2.86) | 5.07                         | (2.97)  |
| <b>Variation in hunger: p=0.65</b>                | 0.45                             | (0.75)  | 0.73                             | (1.40) | 0.43                         | (1.82)  |
| <b>TAP Go/No-go subtest – (T-score): p=0.18</b>   | 48.30                            | (6.72)  | 45.90                            | (7.66) | 44.40                        | (9.28)  |
| <b>TAP Flexibility subtest – (GPI): p=0.92</b>    | 1.32                             | (6.17)  | 1.98                             | (8.74) | 1.27                         | (7.6)   |
|                                                   | n                                | %       | n                                | %      | n                            | %       |
| <b>Sex: p=0.67</b>                                |                                  |         |                                  |        |                              |         |
| <b>Women</b>                                      | 19                               | (61%)   | 17                               | (52%)  | 17                           | (61%)   |
| <b>Men</b>                                        | 12                               | (39%)   | 16                               | (48%)  | 11                           | (39%)   |
| <b>Level of education: p=0.89</b>                 |                                  |         |                                  |        |                              |         |
| <b>&lt; 14 years</b>                              | 16                               | (52%)   | 17                               | (52%)  | 16                           | (57%)   |
| <b>&gt; 14 years</b>                              | 15                               | (48%)   | 16                               | (48%)  | 12                           | (43%)   |

227 weight status groups. Details of sociodemographic characteristics are displayed in Tab 1.

228

229 **Tab. 1:** Participant characteristics. Quantitative variables expressed as mean (SD)

230 <sup>a, b, c</sup> Superscript letters are associated with values (means or numbers), same letters indicating that the difference  
 231 between values is not significant. P values indicate the significance of the weight status effect. GPI = Global  
 232 Performance Index.

233 ***Data preparation***

234 Instruction shifts modulate task difficulty (42), so we created a two-level covariate to account for the cognitive  
235 load generated by the change of instructions between tasks (food-object-food-object). The two levels were  
236 “CL+” for the first 14 trials of each set and “CL-” for the second 14 trials of each set (total of 28 trials). The CL+  
237 condition refers to a situation in which the individual becomes familiar with new instructions (detecting foods in  
238 food sets and detecting objects in object sets) and the implementation of the instructions is automatized during  
239 the set. In the CL- condition, the individual is already familiar with the instructions, implicating a lower  
240 cognitive load. This two-level covariate was integrated in further linear mixed models that are described below.

241 During data preparation, reaction times (RTs) inferior to 150ms were excluded from analysis because they  
242 reflect stimulus anticipation (33). In order to analyse global reaction speed, we summarized, for each participant,  
243 RTs for which the spacebar was pressed (go trials without omissions and no-go trials with errors) by using the  
244 median per condition (olfactory prime type x stimulus type x cognitive load). For errors, we calculated the  
245 proportion of errors on no-go trials for each participant in each condition (olfactory prime type x stimulus type x  
246 cognitive load). For omission errors, the proportion of omissions among the go trials per condition was  
247 calculated for each participant.

248 For each dependent variable (RTs, proportion of commission errors, proportion of omission errors), we estimated  
249 a linear mixed model. The model initially involved four fixed factors (weight status group x stimulus type x  
250 olfactory prime type x cognitive load), all interactions, and the individual as a random factor. We then simplified  
251 the model by removing non-significant terms except if they were involved in a significant higher-order term.  
252 Contrasts were used to interpret significant main effects and interactions.

253 Statistical analysis was performed with R.3.4.3 software (43) using linear mixed models (nlme package v. 3.1-  
254 131,(44) to explain reactivity to stimuli expressed in median RTs, inhibitory control deficit expressed in  
255 proportion of errors, and inattention expressed in proportion of omissions. Specific contrasts were subsequently  
256 tested using the contrast package (45,46). The significance threshold was set at 0.05.

257

258 ***Reaction times (global detection speed)***

259 The main effect of the type of stimulus [ $F(2, 1553)=46.57, p<.0001$ ], the interaction between weight status and  
260 olfactory prime type [ $F(4, 1553)= 3.13, p=0.014$ ] and the interaction between weight status and cognitive load  
261 [ $F(2,1553)]=5.29, p=0.005$ ] reached significance in the RT linear mixed model. Results are shown in Fig 3.

262 Regarding the main effect of stimulus type, individuals detected food pictures faster than object pictures [HED  
263 vs objects = -6.20ms ( $p < 0.001$ ), LED vs objects = -11.39ms ( $p < 0.001$ )], and responded quicker to LED food  
264 pictures than HED food pictures [LED vs HED = -5.18ms, ( $p < 0.001$ )].

265 Regarding the interaction between weight status and olfactory prime type, participants with obesity were slower  
266 to detect stimuli of all types when primed with a pound cake odour [OB, pound cake odour vs none = +5.30ms,  
267 ( $p = 0.01$ ) and, non-significantly, when primed with a pear odour [OB, pear vs. none = +3.54ms, ( $p = 0.09$ )].  
268 Participants with overweight were slower to detect stimuli when primed with a pound cake odour [OW, pear vs  
269 pound cake = +5.10ms ( $p = 0.01$ )] and non-significantly, when they were primed with a pear odour vs. no odour  
270 [OW, pear vs none = +3.6ms, ( $p = 0.07$ )]. On the contrary, participants with normal weight showed no significant  
271 difference between RT when primed with a pound cake odour ( $p = 0.58$ ) or with a pear odour ( $p = 0.30$ ). Without  
272 priming, individuals with normal-weight were slower than individuals with obesity to detect stimuli (no odour,  
273 NW vs OB = +12.41ms, ( $p = 0.03$ )).

274 When we looked at the interaction between weight status and cognitive load, only normal-weight individuals had  
275 different reaction times depending on cognitive load conditions. More specifically, they were slower when the  
276 cognitive load was higher [NW, CL+ vs CL- = +5.22ms, ( $p = 0.002$ )]. In addition, in the higher cognitive load  
277 conditions, normal-weight participants tended to be slower than participants with overweight [CL+, NW vs.  
278 OW = +9.96ms, ( $p = 0.06$ )] and obesity [CL+, NW vs. OB = +10.58ms, ( $p = 0.06$ )]. However, these results only  
279 approached significance.

280

281 **Fig 3.** (left) RT by stimulus type, CTL=objects (control) pictures, HED=high energy-dense foods pictures,  
282 LED=low energy-dense foods pictures, averaged on olfactory prime type, cognitive load condition and weight  
283 status. Each bar is significantly different from the 2 others ( $p < 0.001$ ). (right) RT by olfactory prime type and  
284 weight status (NW=Normal-weight, OW=overweight, OB=obesity), averaged on stimulus type and cognitive  
285 load condition. Predicted values and 95% confidence intervals.

### 286 ***Proportion of commission errors***

287 Three terms of the commission errors linear mixed model reached significance: the main effect of stimulus type  
288 [F(2, 1559)=51.37,  $p < 0.0001$ ], the main effect of cognitive load condition [F(1,1559)=26.43,  $p < 0.001$ ] and the  
289 interaction between cognitive load and stimulus type [F(2, 1559)= 5.32,  $p = 0.005$ ]. Results are shown in Fig 4.

290 Concerning the effect of cognitive load, participants made 32.4% more commission errors in the CL+ condition  
291 than in the CL- condition. [CL+ vs. CL- = +2.14 errors,  $p < 0.001$ ].

292 Stimulus type effect was dependent on cognitive load condition. In both the high and low cognitive conditions,  
293 participants made on average 87.5% more commission errors when facing HED food stimuli than when facing  
294 objects [HED vs objects = +3.92 errors,  $p < 0.0001$ ]. Participants also made 140.5% more commission errors when  
295 facing HED food stimuli than when facing LED food stimuli [HED vs. LED = +4.89 errors,  $p < 0.0001$ ]. A slight  
296 difference in the amount of commission errors made was observed between LED food stimuli and objects, but it  
297 did not reach significance in the CL+ condition [CL+, LED vs. objects = -0.9 errors, (NS,  $p = 0.058$ )].  
298 Nevertheless, in the CL- condition, participants made 94.1% more commission errors for objects than for LED  
299 food stimuli [CL-, objects vs LED = +2.08 errors, ( $p = 0.004$ )].

300 Participants made more commission errors in CL+ conditions than in CL- conditions for food stimuli: 52.7%  
301 and 113% more commission errors were made in the CL+ condition for HED and LED food stimuli, respectively  
302 [HED, CL+ vs. CL- = +3.58 errors,  $p < 0.001$  ; LED, CL+ vs. CL- = +2.54 errors,  $p < 0.001$ ]. Participants did not  
303 make a significantly different proportion of commission errors between high and low cognitive load conditions  
304 when facing object stimuli [objects, CL+ vs. CL- = +0.32 errors,  $p = 0.66$ ].

305 In sum, HED food pictures induced more disinhibition than LED food and object pictures. The cognitive load  
306 modulated this disinhibition for food stimuli but not for neutral stimuli.

307

308 **Fig 4.** Proportion of commission errors by stimulus type and cognitive load condition averaged on olfactory  
309 prime type and weight status. CL+=high cognitive load condition, CL-=low cognitive load condition,  
310 CTL=objects (control) pictures, HED=high energy-dense food pictures, LED=low energy-dense food pictures.  
311 Predicted values and 95% confidence intervals.

#### 312 ***Proportion of omission errors***

313 Only two terms of the linear mixed model reached significance for the proportion of omission errors: main effect  
314 of type of stimulus [F(2,1558)=91.18,  $p < 0.0001$ ] and interaction of weight status group x type of stimulus  
315 [F(4,1558)=2.61,  $p = 0.03$ ].

316 Concerning the main effects of stimulus type, participants made 89.5% more omission errors when facing HED  
317 food stimuli than facing LED food stimuli [HED vs. LED = +6.40 omissions errors,  $p < 0.0001$ ]. They also made

318 significantly fewer omission errors for food stimuli than for objects: 20.1% and 57.9% less errors were made for  
319 HED and LED food stimuli, respectively, in comparison with object stimuli [HED vs. objects=-3.43% omission  
320 errors,  $p<0.0001$ , LED vs. objects= -9.83%,  $p<0.0001$ ].

321 When we focused on the interaction between weight status group and stimulus type, we found that NW  
322 participants made more omissions than OW participants when facing HED food stimuli, but this effect did not  
323 reach significance [HED, NW vs. OW=+4.62 omission errors, ( $p=0.05$ )]. No other effects approached  
324 significance. In sum, food pictures, especially HED foods, elicited more omission errors than neutral pictures in  
325 all participants.

## 326 **DISCUSSION**

327 Our objective was to characterize deficits in inhibitory control toward foods in different weight status groups  
328 (NW, OW, OB), and to assess the impact of implicit olfactory priming (pound cake, pear, control) on such  
329 processes.

### 330 *Global performance*

331 Global performance for inhibitory control was similar for all groups in our sample, as measured by the Go/no-Go  
332 subtest from the TAP, and in flexibility as measured with the flexibility subtest from the same battery. Contrary  
333 to previous findings (16,17,47–49), inhibitory control and mental flexibility capacities were similar regardless of  
334 weight status. In addition, the number of commission errors, omission errors and reaction times in the Food  
335 Inhibition Task revealed no significant differences according to weight status when participants were not primed  
336 with a non-attentively perceived food cue. This suggests that common processes in the detection of stimuli and  
337 inhibition capacities are not dependent on weight status.

338 In our experiment, all participants reacted more quickly to food pictures than to neutral pictures. This highlights  
339 that food stimuli undergoes faster processing, which is in line with previous literature (9,50–54). Indeed, food is  
340 essential for survival (i.e. a primary motivated goal of the individual) and has a rewarding quality, which are  
341 characteristics of a salient stimulus (55). So food stimuli appear to be processed more quickly, which explains  
342 the increased reactivity to foods in all individuals. In the literature focusing on the Go/no-Go paradigm, it has  
343 been suggested that short reaction times indicate an approach tendency (20,42). This supports the hypothesis that  
344 a person needs more cognitive resources to inhibit stimulus-driven approach tendencies as compared to more  
345 neutral stimuli (15,25,56). We can therefore state that this approach bias for foods of all kinds is a prepotent  
346 response in individuals, regardless of the type of food stimuli (HED or LED) or the perceiver's weight status.

347 Moreover, the present study separated the approach bias for low energy-dense (LED) foods and for high energy-  
348 dense (HED) foods. (22), comparing RTs for high-calorie and low-calorie foods, suggested that longer RTs for  
349 HED foods indicated increased attention toward them. This relates to the fact that HED foods capture attention  
350 more forcefully than LED foods in the early stages of cognitive processing, which is consistent with our previous  
351 work on orienting attentional biases (9). Moreover, it seems that HED food stimuli tend to capture attentional  
352 focus for longer periods of time than LED food stimuli. This might be behaviourally reflected in reaction times,  
353 as highlighted by neuroimaging studies showing discriminative patterns of activity in the brain for high and low  
354 calorie food stimuli (56,57). In our experiment, individuals were faster to detect LED food stimuli than HED  
355 food stimuli. This finding may relate to the attentional dimension of inhibitory control (14), which could be  
356 impaired by the perception of HED food pictures.

357 HED food stimuli processing might initially be facilitated by the high perceptual saliency of high calorie foods.  
358 We suggest that over time, the detection of HED food stimuli is impaired by their capacity to attract the focus of  
359 attention (slowed disengagement, (58,59), which slows behavioural responses. On the contrary, LED food  
360 stimuli processing might be facilitated by the earlier identification of fruit stimuli in our experiment. As food  
361 stimuli, LED stimuli are also salient. However, their processing is not impaired by the attentional approach bias  
362 elicited by the higher appetitive quality of HED food stimuli. This effect results in a decrease in reaction times  
363 for LED foods compared with HED foods, partly explaining why participants had shorter RT and fewer omission  
364 errors for LED food stimuli than for HED food stimuli in our experiment.

### 365 ***Modulation of inhibitory control capacities toward food by cognitive load***

366 The high cognitive load condition induced slower reaction times and more commission errors for all participants  
367 facing all types of stimuli in each olfactory condition. This reflects the worse performance and higher mental  
368 effort required to complete the task (60) and confirms that the first half of each set was more difficult, validating  
369 the cognitive load effect when the instructions are changed between two sets.

370 Participants made more commission errors in high cognitive load situations when faced with food stimuli. This  
371 was not the case for neutral stimuli, seeing as the proportion of errors for object pictures did not differ between  
372 the high cognitive load and the low cognitive load condition. This led us to conclude that cognitive load  
373 modulates inhibitory control, but only toward foods. The increase in mental effort that was required to process  
374 the instructions led participants to make significantly more impulsive detections, resulting in more commission  
375 errors. We can deduce that significant cognitive resources were needed for the integration and automatization of

376 the new instructions. In the meantime, the amount of cognitive resources needed to inhibit the approach tendency  
377 elicited by HED foods was increased by the higher cognitive load. There were thus not enough resources  
378 allocated to inhibit interferences from prepotent responses, triggering commission errors. Indeed, the cognitive  
379 load effect indicates that there is a cognitive deficit in inhibitory control prior to behavioural disinhibition, as  
380 indicated by commission errors. This result correlates with previous research investigating the role of cognitive  
381 load in inhibitory control (61) and showing that working memory load (resulting here from the new set of  
382 instructions) interacts heavily with inhibitory control (62).

### 383 *Inhibitory control toward foods*

384 Though we hypothesized that individuals with higher weight status would show less inhibitory control toward  
385 foods than lean individuals, it was not the case in our experiment. In fact, we found common patterns of  
386 inhibitory control toward food stimuli in individuals across the weight status spectrum.

387 In our experiment, participants made more commission errors when they were facing HED food stimuli. No  
388 difference was found in regard to weight status, which is congruent with part of the literature (63,64). This  
389 observation strongly suggests that the lack of inhibition toward foods is a common process for all individuals and  
390 it is also consistent with the idea that the rewarding quality of HED foods makes them more appealing (65–67),  
391 leading to an increased approach bias. The saliency of HED foods combined with the associated approach bias  
392 makes the detection of HED food stimuli a prepotent response for the individual. A prepotent response is  
393 cognitively more difficult to inhibit than other response options, which need to be inhibited in order to exhibit  
394 goal-congruent behaviour. This effect appears to be even stronger when cognitive load is high because  
395 individuals make significantly more commission errors toward HED food stimuli in this condition.

396 We found different patterns of inhibitory control toward HED and LED foods, indicating that the top-down  
397 processing of those stimuli is differentiated. In lower cognitive load conditions, individuals made fewer  
398 commission errors when facing LED food stimuli than when facing HED food or object stimuli. We can thus  
399 presume that fruits (LED foods) are processed faster than other stimuli. This assumption is supported by the  
400 work of Leleu et al., 2016 (68), who showed that fruit pictures elicited earlier event-related responses in the brain  
401 than other food types (vegetables, HED foods) during a food discrimination task.

402 Food stimuli are salient, which induces an approach bias that interferes with the initiation of goal-directed  
403 behaviour on a cognitive level, leading to cognitive and behavioural deficits in inhibitory control. This process  
404 occurs in individuals regardless of weight status, and its intensity seems to vary in function of food

405 characteristics (i.e. category and/or energy density). Moreover, the deficit in inhibitory control induced by food  
406 stimuli is modulated by the cognitive load in working memory, which means that the more mental effort the  
407 individual has to make while performing a task, the fewer resources are available to inhibit prepotent responses.  
408 This phenomenon leads to more disinhibition, meaning that individuals may be more likely to eat more HED  
409 foods when their cognitive load is heavier.

410 ***Priming effects: why does implicit priming only impact bottom-up processes?***

411 In our study, we tested whether implicit priming with olfactory food cues would impact inhibitory control, a  
412 decision-driven, or “top-down” process measured by the proportion of commission errors made by participants  
413 in each olfactory condition. Unexpectedly, no priming effect was observed for commission errors, contrary to the  
414 effects observed with the exact same olfactory priming paradigm used in a Visual Probe Task to measure  
415 orienting attentional biases (a stimulus-driven, bottom-up process) (9). Because orienting attentional biases are  
416 data-driven processes, sensory inputs are important determiners of behavioural response in such tasks (69).  
417 Moreover, the Visual Probe Task needed less top-down cognitive effort than the Food Inhibition Task. Hoffman-  
418 Hensel & al, 2017, who observed that cognitive effort altered the neural processing of food odours, found that  
419 involvement in multiple tasks decreased participants’ perception of odour intensity (70). Moreover, olfaction has  
420 been characterized as an implicit sense, which means that olfactory cues, even when non-attentively perceived,  
421 may not be strong enough to be taken into account for top-down cognitive processes (27,28).

422 We focused on inhibitory control dictated by the changing instructions: attentional resources were thus  
423 theoretically allocated to the pictorial stimuli which left 500ms to participants for: (a) identification of the  
424 stimulus (b) decision-making about whether detecting it or not in line with the instructions of the current set (c)  
425 behavioural response (inhibition or spacebar-pressing). Such processing implies more cognitive involvement in  
426 the task than simply detecting a target on the right or left side of the screen (as in the Visual Probe Task).  
427 Therefore, the Food Inhibition Task does not seem to leave enough resources for the participant to implicitly  
428 integrate the perception of the odorants on the microphone foams within top-down cognitive processing of  
429 information. Another type of less subtle but still implicitly perceived cues should be tested in order to observe  
430 the effects we were expecting in this study.

431 ***Differences in vulnerability to food cues in individuals with higher weight status***

432 Concerning global reaction times, we found some priming effects for individuals with overweight and obesity.  
433 More specifically, individuals with obesity and with overweight were slower to detect all kinds of stimuli when



434 primed with a pound cake odour and a pear odour, respectively, regardless of the go/no-go instructions. In our  
435 study, the odour signalling HED or LED foods could have slowed the bottom-up processing of foods by adding  
436 another element to take into account in the detection of stimuli. This indicates that olfactory food cues were  
437 implicated in the detection process by slowing RT in individuals of higher weight status. We consequently  
438 hypothesize that priming effects only influence the bottom-up processing of food cues.

439 The result of the priming effect seen here is congruent with the results of our previous study on attentional  
440 biases. In this earlier study we found that implicit priming of olfactory food cues had differentiated effects:  
441 individuals with obesity were more vulnerable to a non-attentively perceived pound cake odour (9). For  
442 individuals with overweight in the present study, the effect of the pear odour is consistent with a study by Marty  
443 & al (37) in which olfactory pear and pound cake primes had differentiated effects when they were non-  
444 attentively perceived by children with overweight. Indeed, these children were more prone to choose fruit in a  
445 forced-choice task when they were non-attentively primed with a pear odour. The authors explained this result  
446 by hypothesizing that individuals with overweight might be more confronted to the idea of “dieting” in their  
447 daily lives, and so this concept might be more easily activated by a non-attentively perceived odour signalling a  
448 LED food. Future research could focus on understanding why odours signalling LED foods seem to affect  
449 individuals with overweight while odours signalling HED foods affect individuals with obesity. These food types  
450 may differentially activate certain concepts and mental representations in individuals according to weight status.  
451 Future contributions to the cognitive and psychological characterization of different subtypes of overweight and  
452 obesity could lead to a better understanding of environmental effects on food choices in obesity.

## 453 **LIMITATIONS**

454 As discussed above, our study presents some limitations. First, we question the use of fruit stimuli as LED food  
455 stimuli. Indeed, fruits are frequently consumed in non-processed and raw forms, making it easier to distinguish  
456 them from objects than HED foods in the earliest stages of feature perception. Some empirical data from  
457 electroencephalography demonstrated that fruits do indeed undergo earlier processing. The pattern of evoked  
458 potentials (EPs) for the fruity quality of food stimuli seems distinct from the patterns of EPs observed for  
459 sweetness/saltiness and low/high energetic value (68). Moreover, there is less diversity in the presentation of  
460 fruit in everyday life when compared with sweet HED foods (chocolate bars, cakes and pastries), which come in  
461 a variety of forms. In terms of perception, the distinction between raw and transformed food goes beyond the  
462 calorie content (71). We hypothesize that identifying pictures of fruit over a short time during a single

463 presentation might thus be facilitated because fruits are well-known and belong to a universal category (72).  
464 There are limited options in the pairing of fruits to comparable HED foods because it is difficult to find sweet  
465 calorie-dense foods that are not processed and that belong to a universal category. In our study, we only used  
466 sweet stimuli for odour-congruency and literature fidelity reasons, but this remark may or may not refer to  
467 vegetables, which are also consumed raw and non-processed, but do not benefit from early perception facilitation  
468 (68). There is a need to find pictorial LED stimuli that fit HED stimuli in visual and hedonic properties, but also  
469 in their intrinsic features such as degree of processing and distance from categorical prototype.

470 Several studies have observed interesting priming effects with the pear and pound cake odour, which are odorant  
471 mixtures (9,37,73). These effects were observed in relation to weight status, which indicates the need to identify  
472 olfactory components that tap into specific (and unknown to date) mental representations contributing to weight-  
473 status specific responses. Concerning the implicit priming, we suggest that a context of more incentive  
474 facilitation (involving a less implicit sensory modality than olfaction, or in multi-modal priming) might have a  
475 stronger influence on top-down processing. However, we insist on using implicit priming to experimentally  
476 manipulate the effects of insidious cues from the environment in laboratory experiments seeing as non-  
477 attentively perceived cues appear to have a stronger effect on cognitive processing (9) and behaviour (26) than  
478 explicitly primed cues. In addition, they are more reflective of the influences of environmental cues which often  
479 occur out of the individual's attentional focus (7).

480 Moreover, we suppose that the different stimuli types elicited different attentional control patterns, with HED  
481 food stimuli more likely to attract attention, thus impairing attentional control. Unfortunately, our experiment  
482 was not designed to identify the phenomenon of attentional control toward foods, and reaction times do not  
483 represent a pure measure of distinct attentional mechanisms (20). Such measures should be included in further  
484 experiments in order to refine our understanding of the role of the attentional functions in food stimuli  
485 processing, for instance by adding eye-tracking measurements into the experimental design, similar to the  
486 method tested by Doolan et al (74).

## 487 **PERSPECTIVES**

### 488 *Cognitive load in obesity*

489 In the Ironic Process Theory (75), the daily life stressors increase cognitive load, which modulates inhibitory  
490 control. These synergic effects tend to produce behaviours opposite to what was primarily intended by the  
491 individual. Considerable research has shown that individuals with obesity and overweight are more at risk of

492 exposure to daily life stressors : low income (76), anxiety (77), psychological health impairments (78), physical  
493 comorbidities (79), and discrimination and stigmatization in relation to body weight (80,81). Considering all  
494 these aspects leads us to suppose that individuals with obesity might be subject to higher cognitive loads during  
495 daily decision-making, which could alter their inhibitory control and consequently, produce goal-unrelated  
496 behaviours. In our study, individuals were experimentally confronted to the same amount of cognitive load,  
497 which did made it impossible to discriminate individual levels of inhibitory control toward foods according to  
498 weight status. We now suggest that variations in everyday cognitive load might explain some of the relationships  
499 between behaviourally reflected lack of inhibitory control facing foods and weight status that was identified in  
500 other studies. In future research, these relationships should be characterized in order to better understand  
501 overweight and obesity.

### 502 *Implicit priming as a context of facilitation*

503 Several studies focusing on inhibitory control manipulated the cognitive processing of food stimuli by creating a  
504 context of facilitation with priming (priming concepts of impulsivity (24) and unrestrained food consumption  
505 (25), which led to interesting results. Nevertheless, such priming was explicit and is therefore not reflective of  
506 incidental food cues from the environment, which was part of the objective of our study. Different forms of  
507 implicit priming could be used in future research in order to assess the effects of implicit food cues on inhibitory  
508 control or other top-down processes toward foods in a unimodal or multimodal manner. For instance, the  
509 combination of auditory and olfactory priming has already been suggested as a means to influence individual  
510 food choices (82). In future research, this type of multimodal priming could be used as an experimental context  
511 of facilitation in order to elicit a lack of inhibitory control for food intake.

512

## 513 **CONCLUSION**

514 Our study highlights common mechanisms relative to the top-down processing of foods, regardless of individual  
515 weight status. We demonstrated that an increase in cognitive load leads to more disinhibition. This research  
516 helps to clarify the relationship between cognitive load and reactivity to food. Future research should focus on  
517 weight status in relation to cognitive load in order to improve our understanding of unhealthy food choices in  
518 obesity. The specific priming effects of food cues by weight status were characterized in bottom-up processing,  
519 which opens a new path for research on mental representations activated by food cues among the weight status  
520 continuum. Moreover, because goal-directed cognitive processing relies on controlled treatment of information,

521 characterizing weight-status specific psychological and behavioural features might help us to recognize the link  
522 between priming, cognitive processing of food information, context, and weight status.

523

524 *Acknowledgments*

525

526 We would like to thank the society Psytest, for lending us the five TAP versions, and especially Mr Benjamin  
527 Steves for his informative help about the material. We also would like to thank Jacques Maratray for developing  
528 the Food Inhibition Task and Suzanne Rankin for English proofreading. We also thank the Chemosens platform  
529 for their help with participants' recruitment, as well as Maya Filhon for her technical help during experimental  
530 sessions.

## REFERENCES

- 531  
532
- 533 1. Batterink L, Yokum S, Stice E. Body mass correlates inversely with inhibitory control in response to food  
534 among adolescent girls: an fMRI study. *NeuroImage*. 1 oct 2010;52(4):1696-703.
  - 535 2. Houben K, Nederkoorn C, Jansen A. Eating on impulse: The relation between overweight and food-  
536 specific inhibitory control. *Obesity*. 2014;22(5):E6-8.
  - 537 3. Swinburn BA, Sacks G, Hall KD, McPherson K, Finegood DT, Moodie ML, et al. The global obesity  
538 pandemic: shaped by global drivers and local environments. *The Lancet*. 27 août 2011;378(9793):804-14.
  - 539 4. Glanz K, Sallis JF, Saelens BE, Frank LD. Healthy Nutrition Environments: Concepts and Measures. *Am*  
540 *J Health Promot*. 1 mai 2005;19(5):330-3.
  - 541 5. Paquet C, de Montigny L, Labban A, Buckeridge D, Ma Y, Arora N, et al. The moderating role of food  
542 cue sensitivity in the behavioral response of children to their neighborhood food environment: a cross-  
543 sectional study. *Int J Behav Nutr Phys Act*. 5 juill 2017;14(1):86.
  - 544 6. Townshend T, Lake A. Obesogenic environments: current evidence of the built and food environments.  
545 *Perspect Public Health*. janv 2017;137(1):38-44.
  - 546 7. Cohen DA. Neurophysiological pathways to obesity: below awareness and beyond individual control.  
547 *Diabetes*. juill 2008;57(7):1768-73.
  - 548 8. Manohar SG, Husain M. Attention as foraging for information and value. *Front Hum Neurosci*.  
549 2013;7:711.
  - 550 9. Mas M, Brindisi M-C, Chabanet C, Nicklaus S, Chambaron S. Weight Status and Attentional Biases  
551 Toward Foods: Impact of Implicit Olfactory Priming. *Front Psychol* [Internet]. 2019 [cité 9 août 2019];10.  
552 Disponible sur: <https://www.frontiersin.org/articles/10.3389/fpsyg.2019.01789/full>
  - 553 10. Ahern AL, Field M, Yokum S, Bohon C, Stice E. Relation of dietary restraint scores to cognitive biases  
554 and reward sensitivity. *Appetite*. 1 août 2010;55(1):61-8.
  - 555 11. Barkley RA. *Executive Functions: What They Are, How They Work, and Why They Evolved*. Guilford  
556 Press; 2012. 258 p.
  - 557 12. Cserjési R, Luminet O, Poncelet A-S, Lénárd L. Altered executive function in obesity. Exploration of the  
558 role of affective states on cognitive abilities. *Appetite*. avr 2009;52(2):535-9.
  - 559 13. Friedman NP, Miyake A. The relations among inhibition and interference control functions: a latent-  
560 variable analysis. *J Exp Psychol Gen*. mars 2004;133(1):101-35.
  - 561 14. Diamond A. *Executive Functions*. *Annu Rev Psychol*. 2013;64(1):135-68.
  - 562 15. Appelhans BM. Neurobehavioral Inhibition of Reward-driven Feeding: Implications for Dieting and  
563 Obesity. *Obesity*. 2009;17(4):640-7.
  - 564 16. Boeka AG, Lokken KL. Neuropsychological performance of a clinical sample of extremely obese  
565 individuals. *Arch Clin Neuropsychol*. 1 juill 2008;23(4):467-74.
  - 566 17. Fagundo AB, de la Torre R, Jiménez-Murcia S, Agüera Z, Granero R, Tárrega S, et al. Executive functions  
567 profile in extreme eating/weight conditions: From anorexia nervosa to obesity. *PLoS ONE*. 2012;7(8).
  - 568 18. Nederkoorn C, Smulders FTY, Havermans RC, Roefs A, Jansen A. Impulsivity in obese women. *Appetite*.  
569 1 sept 2006;47(2):253-6.

- 570 19. Prickett C, Brennan L, Stolwyk R. Examining the relationship between obesity and cognitive function: A  
571 systematic literature review. *Obes Res Clin Pract.* 1 mars 2015;9(2):93-113.
- 572 20. Meule A, Lutz APC, Krawietz V, Stützer J, Vögele C, Kübler A. Food-cue affected motor response  
573 inhibition and self-reported dieting success: a pictorial affective shifting task. *Front Psychol* [Internet]. 13  
574 mars 2014 [cité 24 oct 2019];5. Disponible sur: <https://www.ncbi.nlm.nih.gov/pmc/articles/PMC3952046/>
- 575 21. Kulendran M, Vlaev I, Sugden C, King D, Ashrafian H, Gately P, et al. Neuropsychological assessment as  
576 a predictor of weight loss in obese adolescents. *Int J Obes.* avr 2014;38(4):507-12.
- 577 22. Meule A, Kübler A. Double trouble. Trait food craving and impulsivity interactively predict food-cue  
578 affected behavioral inhibition. *Appetite.* 1 août 2014;79:174-82.
- 579 23. Price M, Lee M, Higgs S. Food-specific response inhibition, dietary restraint and snack intake in lean and  
580 overweight/obese adults: a moderated-mediation model. *Int J Obes* 2005. mai 2016;40(5):877-82.
- 581 24. Guerrieri R, Nederkoorn C, Jansen A. Disinhibition is easier learned than inhibition. The effects of  
582 (dis)inhibition training on food intake. *Appetite.* août 2012;59(1):96-9.
- 583 25. Hall PA. Executive control resources and frequency of fatty food consumption: Findings from an age-  
584 stratified community sample. *Health Psychol.* 2012;31(2):235-41.
- 585 26. Marteau TM, Hollands GJ, Fletcher PC. Changing human behavior to prevent disease: the importance of  
586 targeting automatic processes. *Science.* 21 sept 2012;337(6101):1492-5.
- 587 27. Köster EP. The Specific Characteristics of the Sense of Smell. In: Rouby C, Schaal B, Dubois D, Gervais  
588 R, Holley A, éditeurs. *Olfaction, Taste, and Cognition.* 1 édition. New York: Cambridge University Press;  
589 2002.
- 590 28. Smeets MAM, Dijksterhuis GB. Smelly primes – when olfactory primes do or do not work. *Front Psychol*  
591 [Internet]. 12 févr 2014 [cité 6 déc 2019];5. Disponible sur:  
592 <https://www.ncbi.nlm.nih.gov/pmc/articles/PMC3921890/>
- 593 29. Komaroff M. For Researchers on Obesity: Historical Review of Extra Body Weight Definitions [Internet].  
594 *Journal of Obesity.* 2016 [cité 13 sept 2018]. Disponible sur:  
595 <https://www.hindawi.com/journals/job/2016/2460285/>
- 596 30. Nuttall FQ. Body Mass Index. *Nutr Today.* mai 2015;50(3):117-28.
- 597 31. Dias R, Robbins TW, Roberts AC. Dissociation in prefrontal cortex of affective and attentional shifts.  
598 *Nature.* mars 1996;380(6569):69-72.
- 599 32. Murphy FC, Sahakian BJ, Rubinsztein JS, Michael A, Rogers RD, Robbins TW, et al. Emotional bias and  
600 inhibitory control processes in mania and depression. *Psychol Med.* nov 1999;29(6):1307-21.
- 601 33. Mobbs O, Iglesias K, Golay A, Van der Linden M. Cognitive deficits in obese persons with and without  
602 binge eating disorder. Investigation using a mental flexibility task. *Appetite.* août 2011;57(1):263-71.
- 603 34. Gomez P, Ratcliff R, Perea M. A Model of the Go/No-Go Task. *J Exp Psychol Gen.* août  
604 2007;136(3):389-413.
- 605 35. Blechert J, Lender A, Polk S, Busch NA, Ohla K. Food-Pics\_Extended—An Image Database for  
606 Experimental Research on Eating and Appetite: Additional Images, Normative Ratings and an Updated  
607 Review. *Front Psychol* [Internet]. 2019 [cité 14 nov 2019];10. Disponible sur:  
608 <https://www.frontiersin.org/articles/10.3389/fpsyg.2019.00307/full>
- 609 36. Bezdjian S, Baker LA, Lozano DI, Raine A. Assessing inattention and impulsivity in children during the  
610 Go/NoGo task. *Br J Dev Psychol.* 1 juin 2009;27(2):365-83.

- 611 37. Marty L, Bentivegna H, Nicklaus S, Monnery-Patris S, Chambaron S. Non-Conscious Effect of Food  
612 Odors on Children's Food Choices Varies by Weight Status. *Front Nutr.* 2017;4:16.
- 613 38. Zimmermann P, Fimm B. Tests d'Évaluation de l'Attention (TAP) - Version 2.3.1. Herzogenrath: Psytest.;  
614 2010.
- 615 39. Callahan S, Rousseau A, Knotter A, Bru V, Danel M, Cueto C, et al. [Diagnosing eating disorders:  
616 presentation of a new diagnostic test and an initial epidemiological study of eating disorders in  
617 adolescents]. *L'Encephale.* 2003;29(3 Pt 1):239-47.
- 618 40. Mintz LB, O'Halloran MS, Mulholland AM, Schneider PA. Questionnaire for Eating Disorder Diagnoses:  
619 Reliability and validity of operationalizing DSM—IV criteria into a self-report format. *J Couns Psychol.*  
620 1997;44(1):63-79.
- 621 41. Thomas-Danguin T, Rouby C, Sicard G, Vigouroux M, Farget V, Johanson A, et al. Development of the  
622 ETOC: a European test of olfactory capabilities. *Rhinology.* sept 2003;41(3):142-51.
- 623 42. Meule A. Reporting and Interpreting Task Performance in Go/No-Go Affective Shifting Tasks. *Front*  
624 *Psychol* [Internet]. 9 mai 2017 [cité 24 oct 2019];8. Disponible sur:  
625 <https://www.ncbi.nlm.nih.gov/pmc/articles/PMC5422529/>
- 626 43. R Development Core Team. R: A Language and Environment for Statistical Computing [Internet]. Vienna,  
627 Austria: R Foundation for Statistical Computing; 2008. Disponible sur: [http://www.r-](http://www.r-project.org/%7D%2C/)  
628 [project.org/%7D%2C/](http://www.r-project.org/%7D%2C/)
- 629 44. Pinheiro J, Bates D. nlme: Linear and Nonlinear Mixed Effects Models. R package version 3.1-137  
630 [Internet]. R core team; 2018 [cité 21 août 2018]. Disponible sur: [https://CRAN.R-](https://CRAN.R-project.org/package=nlme)  
631 [project.org/package=nlme](https://CRAN.R-project.org/package=nlme)
- 632 45. Chambers JM, Hastie T. *Statistical Models in S.* Wadsworth & Brooks/Cole Advanced Books & Software;  
633 1992. 630 p.
- 634 46. Kuhn M. contrast: A Collection of Contrast Methods [Internet]. 2016. Disponible sur: [https://CRAN.R-](https://CRAN.R-project.org/package=contrast)  
635 [project.org/package=contrast](https://CRAN.R-project.org/package=contrast)
- 636 47. Fergenbaum JH, Bruce S, Lou W, Hanley AJG, Greenwood C, Young TK. Obesity and Lowered  
637 Cognitive Performance in a Canadian First Nations Population. *Obesity.* 2009;17(10):1957-63.
- 638 48. Meo SA, Altuwaym AA, Alfallaj RM, Alduraibi KA, Alhamoudi AM, Alghamdi SM, et al. Effect of  
639 Obesity on Cognitive Function among School Adolescents: A Cross-Sectional Study. *Obes Facts.*  
640 2019;12(2):150-6.
- 641 49. Prickett C, Stolwyk R, O'Brien P, Brennan L. Neuropsychological Functioning in Mid-life Treatment-  
642 Seeking Adults with Obesity: a Cross-sectional Study. *Obes Surg.* 1 févr 2018;28(2):532-40.
- 643 50. de Oca BM, Black AA. Bullets versus burgers: is it threat or relevance that captures attention? *Am J*  
644 *Psychol.* 2013;126(3):287-300.
- 645 51. Junghans AF, Evers C, Ridder DTDD. Eat Me If You Can: Cognitive Mechanisms Underlying the  
646 Distance Effect. *PLOS ONE.* 18 déc 2013;8(12):e84643.
- 647 52. Nummenmaa L, Hietanen JK, Calvo MG, Hyönä J. Food Catches the Eye but Not for Everyone: A BMI-  
648 Contingent Attentional Bias in Rapid Detection of Nutriment. *PLOS ONE.* 16 mai 2011;6(5):e19215.
- 649 53. Sawada R, Sato W, Toichi M, Fushiki T. Fat Content Modulates Rapid Detection of Food: A Visual  
650 Search Study Using Fast Food and Japanese Diet. *Front Psychol* [Internet]. 22 juin 2017 [cité 1 oct  
651 2019];8. Disponible sur: <https://www.ncbi.nlm.nih.gov/pmc/articles/PMC5479904/>
- 652 54. Teslovich T, Freidl EK, Kostro K, Weigel J, Davidow JY, Riddle MC, et al. Probing behavioral responses  
653 to food: development of a food-specific go/no-go task. *Psychiatry Res.* 30 sept 2014;219(1):166-70.

- 654 55. Munneke J, Belopolsky AV, Theeuwes J. Distractors associated with reward break through the focus of  
655 attention. *Atten Percept Psychophys*. 2016;78(7):2213-25.
- 656 56. Carbine KA, Christensen E, LeCheminant JD, Bailey BW, Tucker LA, Larson MJ. Testing food-related  
657 inhibitory control to high- and low-calorie food stimuli: Electrophysiological responses to high-calorie  
658 food stimuli predict calorie and carbohydrate intake. *Psychophysiology*. 1 juill 2017;54(7):982-97.
- 659 57. Frank S, Laharnar N, Kullmann S, Veit R, Canova C, Hegner YL, et al. Processing of food pictures:  
660 Influence of hunger, gender and calorie content. *Brain Res*. 2 sept 2010;1350:159-66.
- 661 58. Smeets E, Roefs A, van Furth E, Jansen A. Attentional bias for body and food in eating disorders:  
662 Increased distraction, speeded detection, or both? *Behav Res Ther*. 1 févr 2008;46(2):229-38.
- 663 59. Wilson C, Wallis DJ. Attentional Bias and Slowed Disengagement from Food and Threat Stimuli in  
664 Restrained Eaters Using a Modified Stroop Task. *Cogn Ther Res*. 1 févr 2013;37(1):127-38.
- 665 60. Paas F, Renkl A, Sweller J. Cognitive Load Theory and Instructional Design: Recent Developments. *Educ*  
666 *Psychol*. 1 mars 2003;38(1):1-4.
- 667 61. Dohle S, Diel K, Hofmann W. Executive functions and the self-regulation of eating behavior: A review.  
668 *Appetite*. 01 2018;124:4-9.
- 669 62. Tiego J, Testa R, Bellgrove MA, Pantelis C, Whittle S. A Hierarchical Model of Inhibitory Control. *Front*  
670 *Psychol* [Internet]. 2 août 2018 [cité 14 nov 2019];9. Disponible sur:  
671 <https://www.ncbi.nlm.nih.gov/pmc/articles/PMC6085548/>
- 672 63. Deux N, Schlarb AA, Martin F, Holtmann M, Hebebrand J, Legenbauer T. Overweight in adolescent,  
673 psychiatric inpatients: A problem of general or food-specific impulsivity? *Appetite*. 01 2017;112:157-66.
- 674 64. Loeber S, Grosshans M, Korucuoglu O, Vollmert C, Vollstädt-Klein S, Schneider S, et al. Impairment of  
675 inhibitory control in response to food-associated cues and attentional bias of obese participants and  
676 normal-weight controls. *Int J Obes*. oct 2012;36(10):1334-9.
- 677 65. Alonso-Alonso M, Woods SC, Pelchat M, Grigson PS, Stice E, Farooqi S, et al. Food reward system:  
678 current perspectives and future research needs. *Nutr Rev*. mai 2015;73(5):296-307.
- 679 66. Berridge KC, Kringelbach ML. Pleasure systems in the brain. *Neuron*. 6 mai 2015;86(3):646-64.
- 680 67. Joyner MA, Kim S, Gearhardt AN. Investigating an Incentive-Sensitization Model of Eating Behavior:  
681 Impact of a Simulated Fast-Food Laboratory. *Clin Psychol Sci*. 1 nov 2017;5(6):1014-26.
- 682 68. Leleu A. Temporal dynamics of odor integration in the visual categorization of food. 7th European  
683 Conférence on Sensory and Consumer Research (EuroSense); 2016 sept 11; Dijon (France).
- 684 69. Posner MI. Orienting of attention. *Q J Exp Psychol*. 1 févr 1980;32(1):3-25.
- 685 70. Hoffmann-Hensel SM, Sijben R, Rodriguez-Raecke R, Freiherr J. Cognitive Load Alters Neuronal  
686 Processing of Food Odors. *Chem Senses*. 31 oct 2017;42(9):723-36.
- 687 71. Rumiati RI, Foroni F. We are what we eat: How food is represented in our mind/brain. *Psychon Bull Rev*.  
688 1 août 2016;23(4):1043-54.
- 689 72. Toet A, Kaneko D, de Kruijf I, Ushiyama S, van Schaik MG, Brouwer A-M, et al. CROCUFID: A Cross-  
690 Cultural Food Image Database for Research on Food Elicited Affective Responses. *Front Psychol*  
691 [Internet]. 2019 [cité 6 déc 2019];10. Disponible sur:  
692 <https://www.frontiersin.org/articles/10.3389/fpsyg.2019.00058/full>
- 693 73. Gaillet M, Sulmont-Rossé C, Issanchou S, Chabanet C, Chamberon S. Priming effects of an olfactory food  
694 cue on subsequent food-related behaviour. *Food Qual Prefer*. 1 déc 2013;30(2):274-81.



- 695 74. Doolan KJ, Breslin G, Hanna D, Murphy K, Gallagher AM. Visual attention to food cues in obesity: An  
696 eye-tracking study. *Obesity*. 2014;22(12):2501-7.
- 697 75. Wegner DM. Ironic processes of mental control. *Psychol Rev*. 1994;101(1):34-52.
- 698 76. Kim TJ, Knesebeck O von dem. Income and obesity: what is the direction of the relationship? A  
699 systematic review and meta-analysis. *BMJ Open* [Internet]. 1 janv 2018 [cité 6 déc 2019];8(1). Disponible  
700 sur: <https://bmjopen.bmj.com/content/8/1/e019862>
- 701 77. Amiri S, Behnezhad S. Obesity and anxiety symptoms: a systematic review and meta-analysis.  
702 *neuropsychiatrie*. 1 juin 2019;33(2):72-89.
- 703 78. Sarwer DB, Polonsky HM. The Psychosocial Burden of Obesity. *Endocrinol Metab Clin North Am*. 1 sept  
704 2016;45(3):677-88.
- 705 79. Djalalinia S, Qorbani M, Peykari N, Kelishadi R. Health impacts of Obesity. *Pak J Med Sci*.  
706 2015;31(1):239-42.
- 707 80. Major B, Hunger JM, Bunyan DP, Miller CT. The ironic effects of weight stigma. *J Exp Soc Psychol*. 1  
708 mars 2014;51:74-80.
- 709 81. Puhl R, Brownell KD. Bias, Discrimination, and Obesity. *Obes Res*. 2001;9(12):788-805.
- 710 82. Chambaron S, Chisin Q, Chabanet C, Issanchou S, Brand G. Impact of olfactory and auditory priming on  
711 the attraction to foods with high energy density. *Appetite*. 1 déc 2015;95:74-80.
- 712
- 713
- 714
- 715
- 716
- 717
- 718
- 719
- 720
- 721
- 722

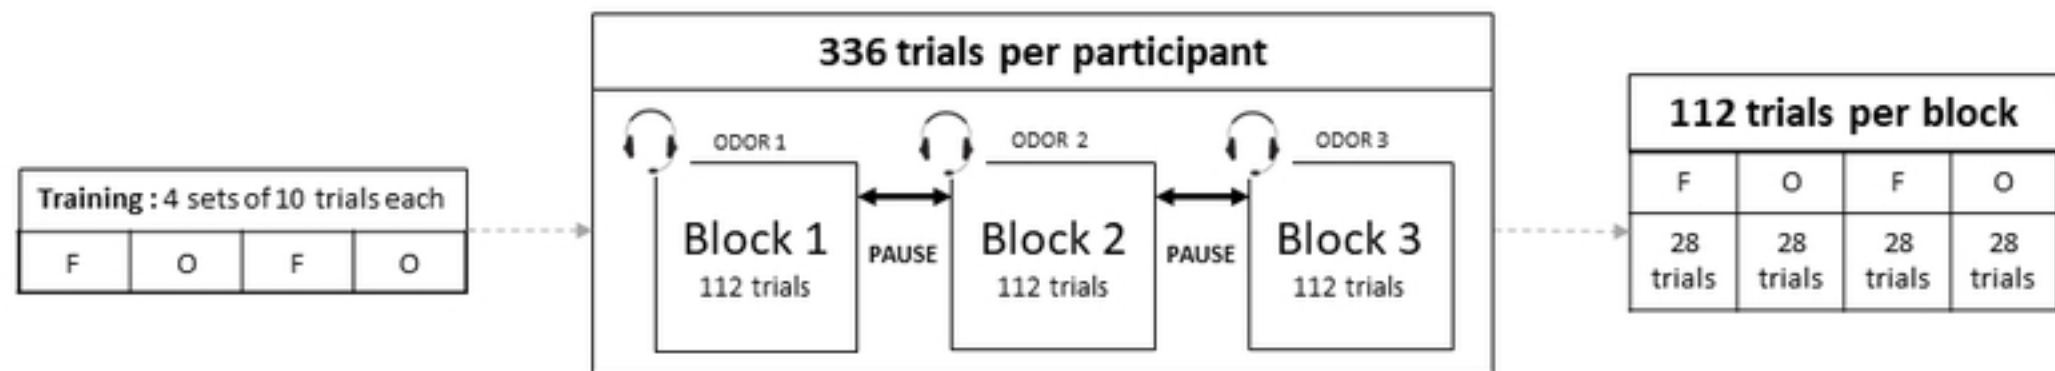

**Block composition**

|     |                                  | 50%                                                                                      | 50%                                                                                      | Stimuli examples                                                                     |                                                                                      |
|-----|----------------------------------|------------------------------------------------------------------------------------------|------------------------------------------------------------------------------------------|--------------------------------------------------------------------------------------|--------------------------------------------------------------------------------------|
|     |                                  | FOOD set (F)                                                                             | OBJECT set (O)                                                                           |                                                                                      |                                                                                      |
| 56% | Food pictures (50% HDE, 50% LDE) | <b>GO</b><br>Participant has to press space bar in order to detect target stimulus       | <b>NO GO</b><br>Participant must withhold his/her response to ignore distractor stimulus |   |   |
|     | Object pictures                  | <b>NO GO</b><br>Participant must withhold his/her response to ignore distractor stimulus | <b>GO</b><br>Participants has to press space bar in order to detect target stimulus      |  |  |
| 44% |                                  |                                                                                          |                                                                                          |                                                                                      |                                                                                      |

Figure 1

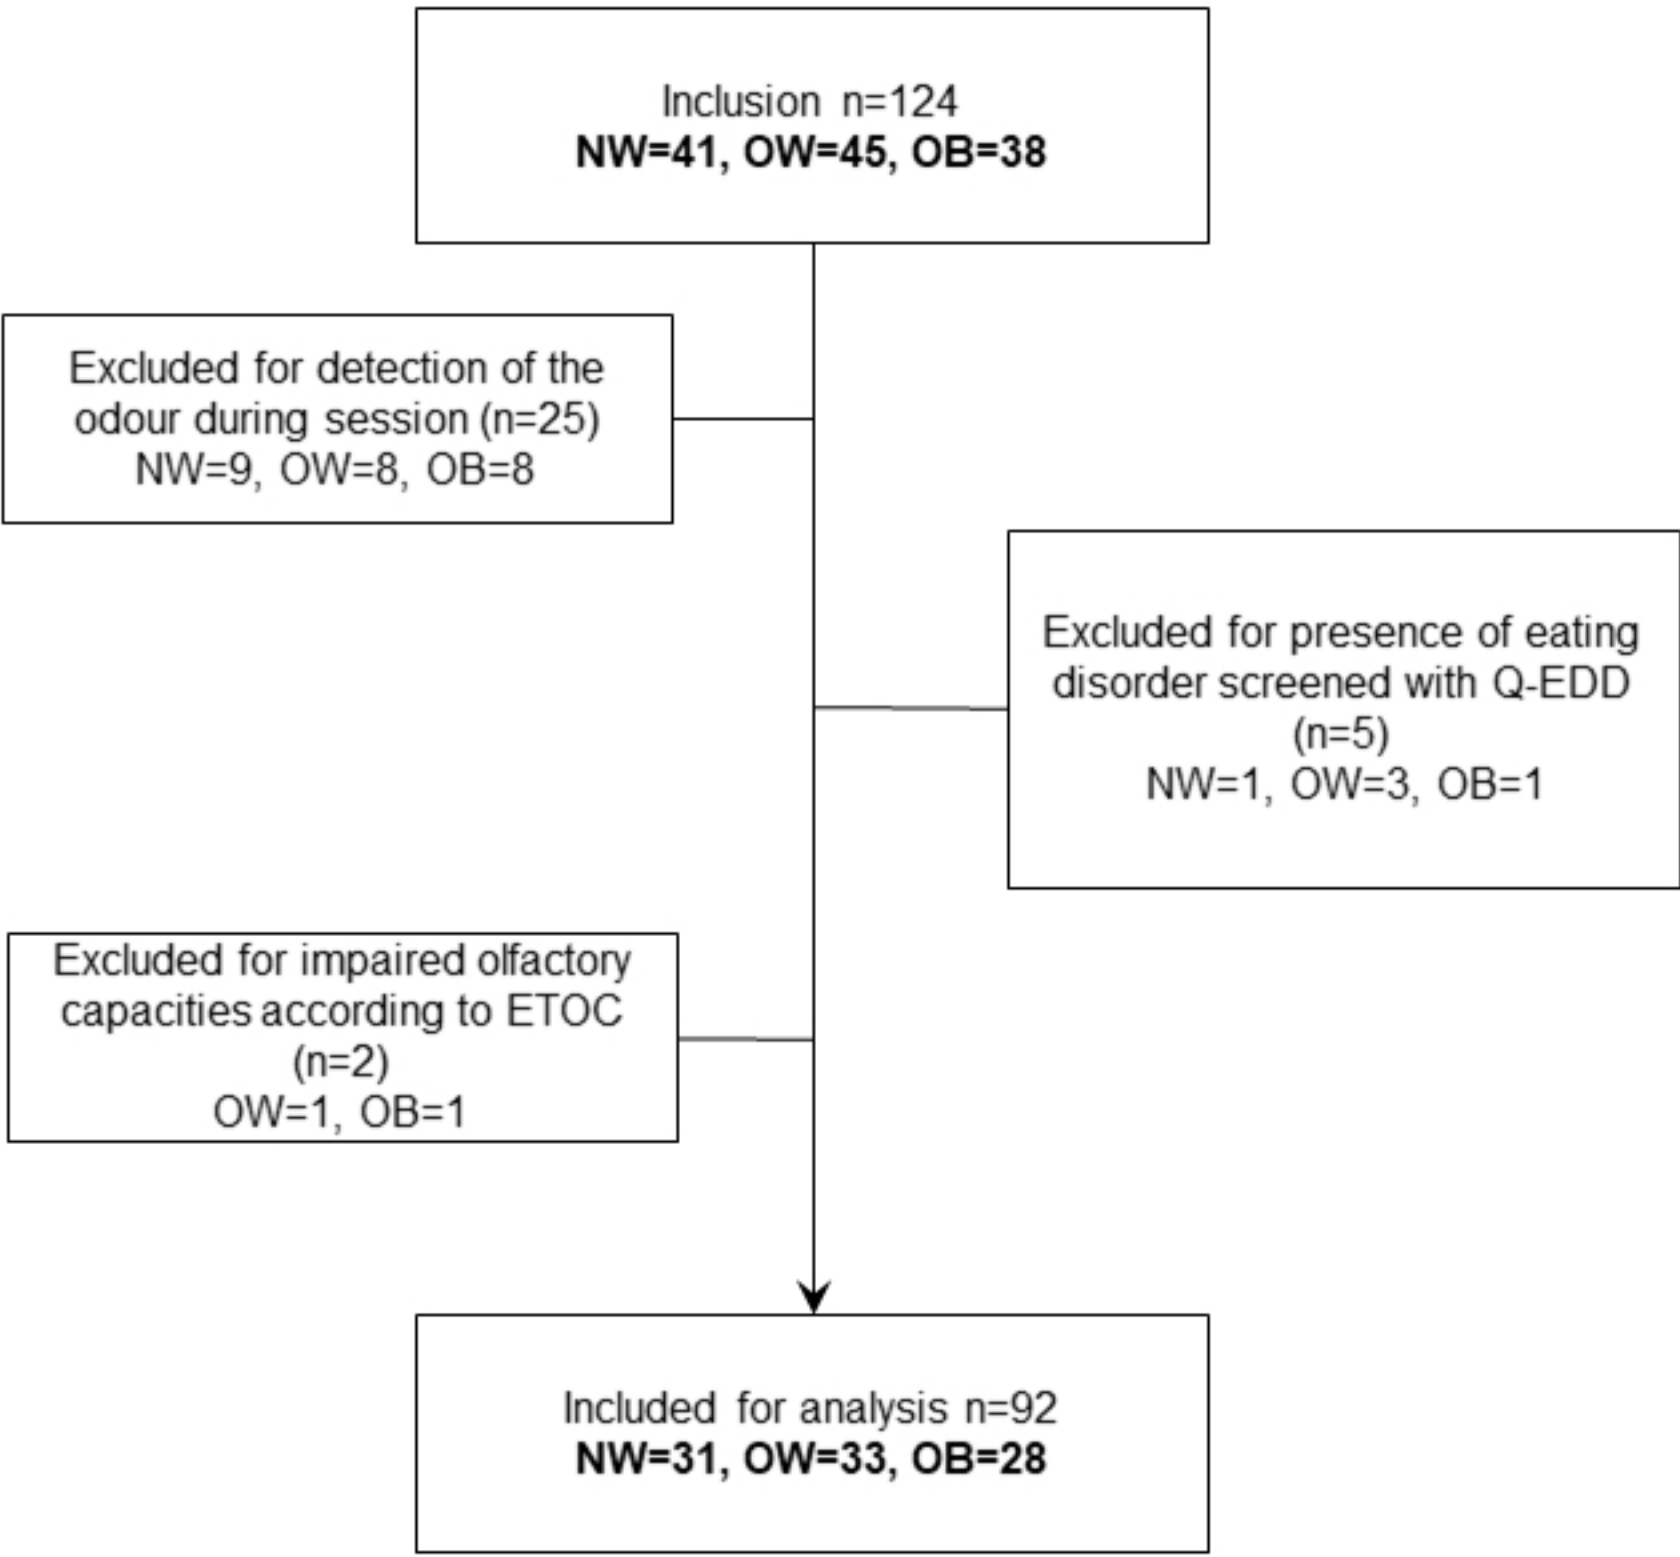

Figure 2

RT by stimulus type

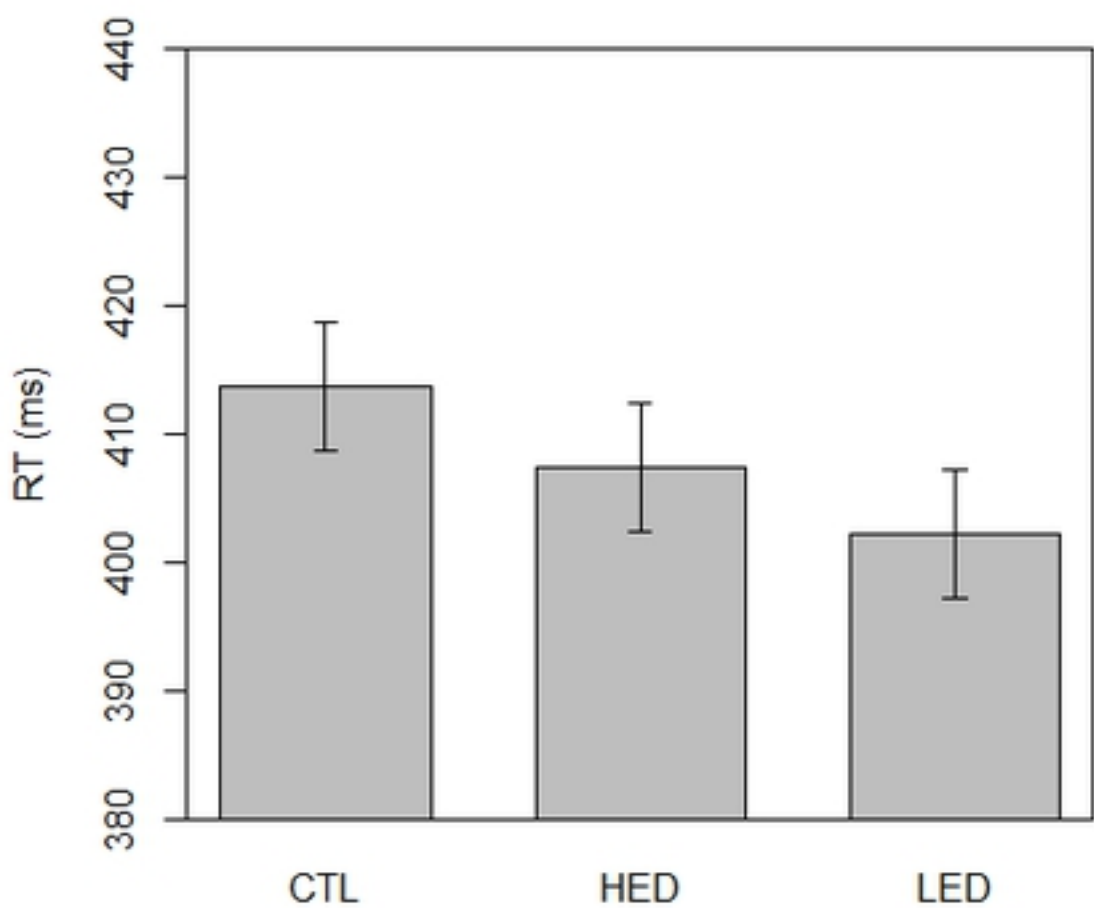

RT by olfactory prime type and weight status

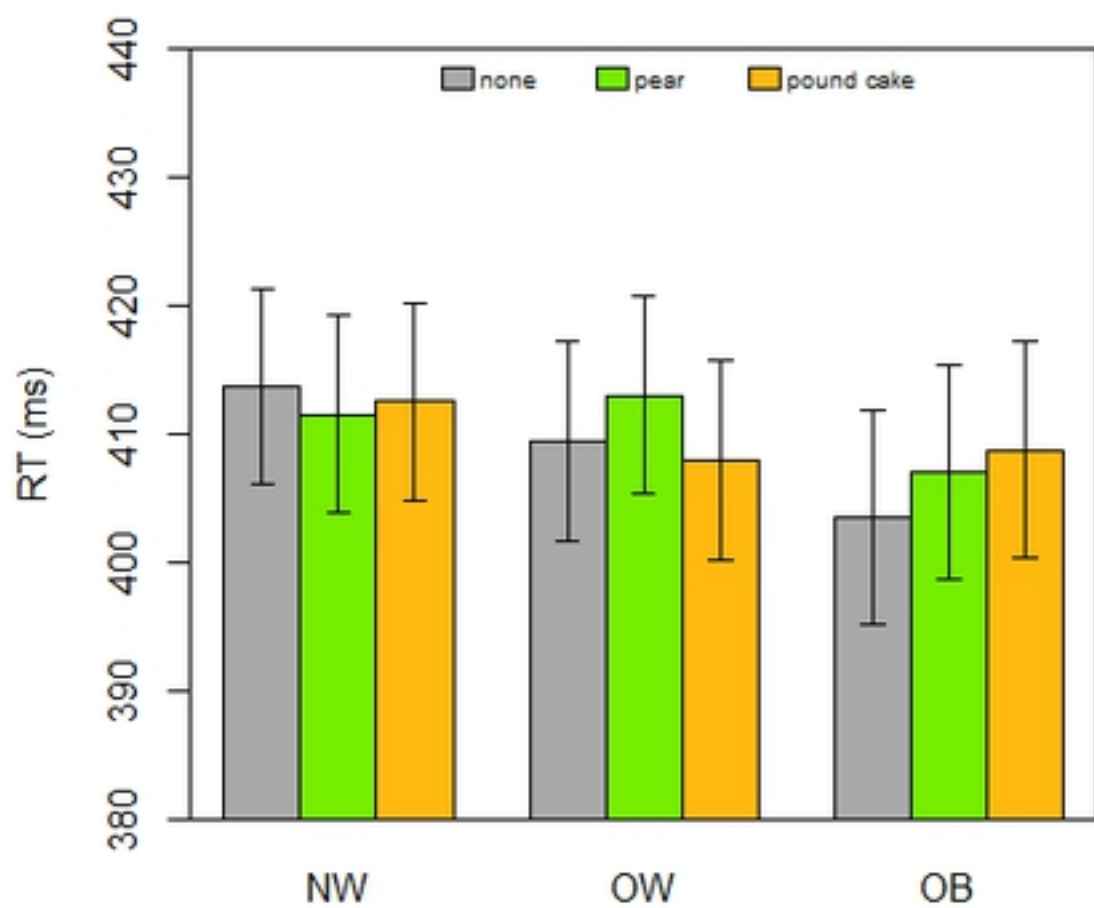

Figure 3

**Proportion of commission errors  
by stimulus type and cognitive load condition**

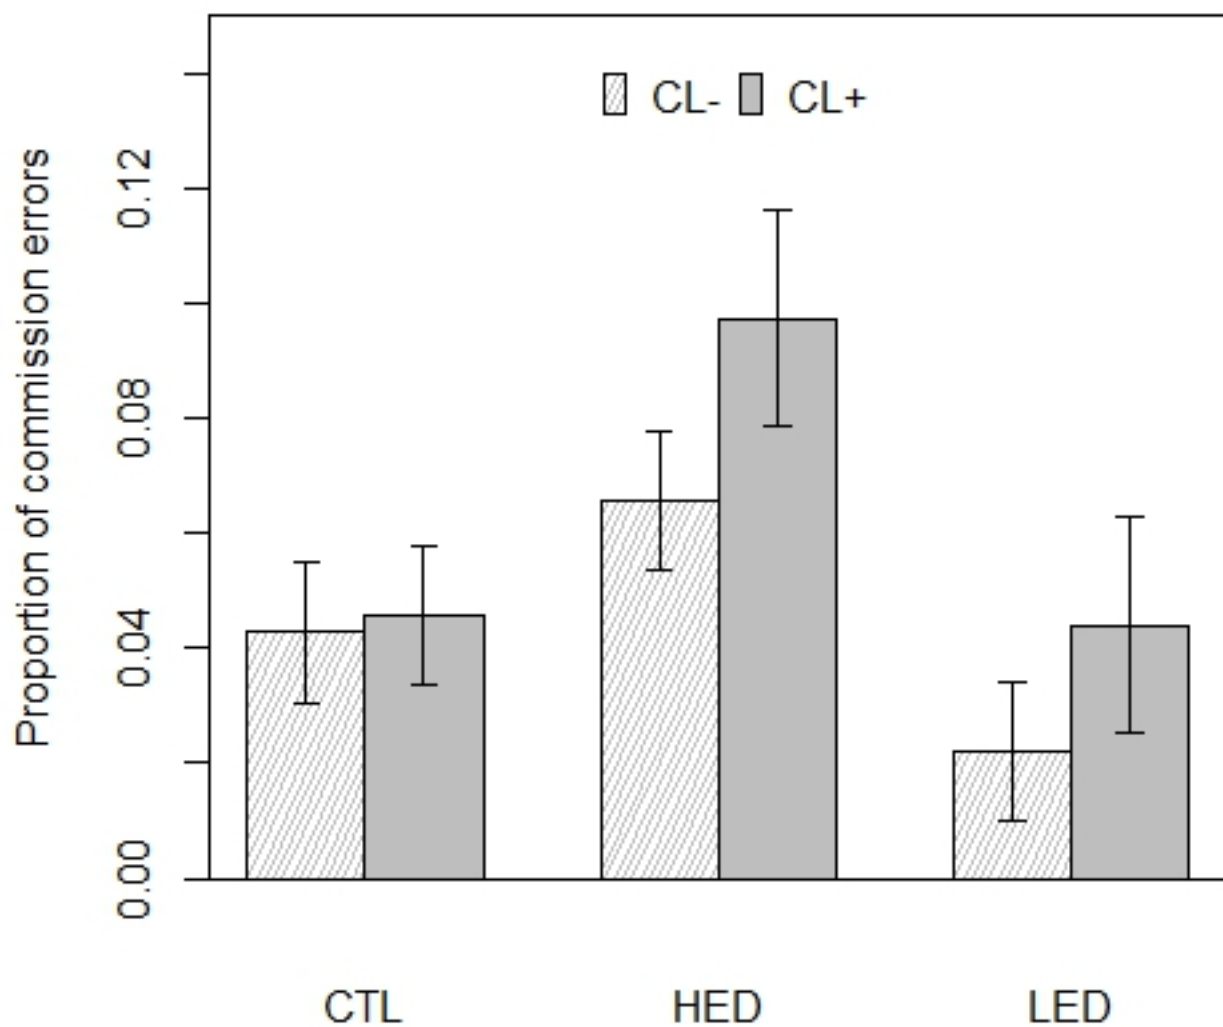

**Figure 4**
